# Supplementary material for: Vat photopolymerization of charged monomers: 3D printing with supramolecular interactions
Source: Royal Society of Chemistry journal article supplement (doi:10.1039/c8py01792a), 2019-01-01
Supplement: c8py01792a1.pdf [file c8py01792a1.pdf]

## Vat Photopolymerization of Charged Monomers: 3D Printing with Supramolecular Interactions

Emily M. Wilts<sup>1</sup>, Allison M. Pekkanen<sup>2</sup>, B. Tyler White<sup>1</sup>, Viswanath Meenakshisundaram<sup>3</sup>, Donald A. Aduba<sup>3</sup>, Christopher B. Williams<sup>3</sup>, and Timothy E. Long<sup>1\*</sup>

### Supplemental

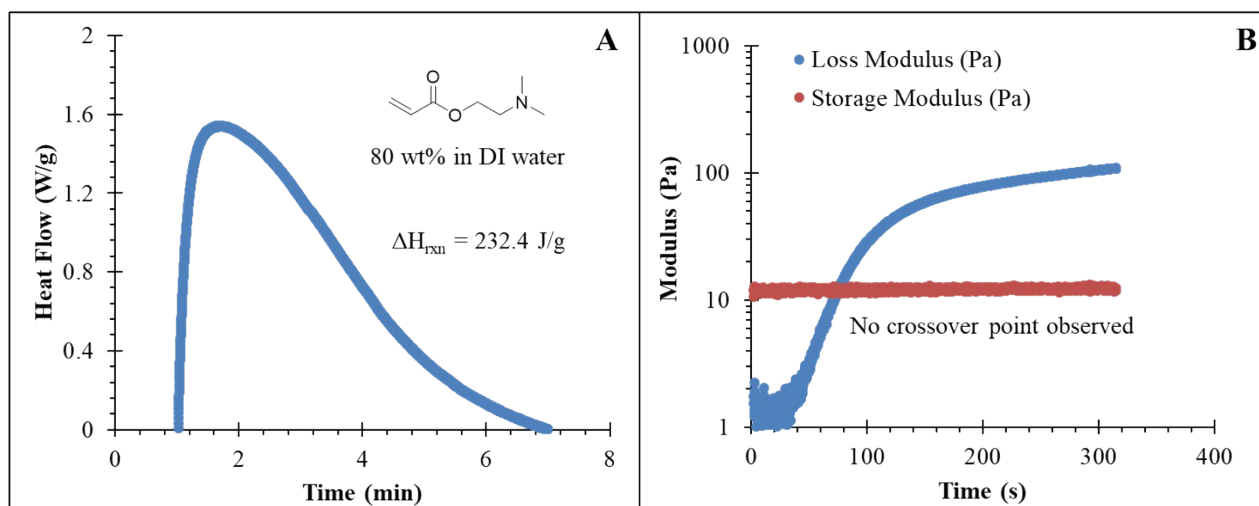

**Figure S1.** (A) Photo-DSC of 2-(dimethylamino)ethyl acrylate in 80 wt% DI water as a non-charged control compared to TMAEA. (B) Photo-rheology of the same system where no crossover point is observed, which suggested a solid was not formed.

**Table S1.** Photo-DSC results and subsequent percent conversion calculations of every homopolymer and TMAEA/NVP copolymer system.

| Sample       | Theoretical $\Delta H_{\text{polymerization}}$ (J/g) | Measured $\Delta H_{\text{polymerization}}$ (J/g) | Percent Conversion (%) |
|--------------|------------------------------------------------------|---------------------------------------------------|------------------------|
| TMAEA        | 387                                                  | 290                                               | 75                     |
| AAS          | 360                                                  | 126                                               | 35                     |
| AASNa        | 325                                                  | 130                                               | 40                     |
| SPAK         | 322                                                  | 145                                               | 45                     |
| TMAEA/NVP2.5 | 354                                                  | 290                                               | 82                     |
| TMAEA/NVP5   | 365                                                  | 317                                               | 87                     |
| TMAEA/NVP10  | 342                                                  | 307                                               | 90                     |
| TMAEA/NVP20  | 346                                                  | 305                                               | 88                     |
| TMAEA/NVP30  | 325                                                  | 292                                               | 90                     |

**Table S2.** Tensile results of photopolymerized films of homopolymers.

| Sample    | Stress at 100 % elongation (MPa) | Elongation (%) |
|-----------|----------------------------------|----------------|
| TMAEA     | $9.2 \cdot 10^{-2} \pm 0.53$     | $1250 \pm 100$ |
| AAS       | $6.7 \cdot 10^{-3} \pm 0.21$     | $250 \pm 55$   |
| AASNa     | $9.7 \cdot 10^{-3} \pm 0.34$     | $550 \pm 130$  |
| SPAK      | $3.7 \cdot 10^{-3} \pm 0.2$      | $1130 \pm 80$  |
| PEGMEA480 | $5.1 \cdot 10^{-3} \pm 0.43$     | $830 \pm 240$  |

| Sample      | Stress at 100 % elongation (MPa) | Elongation (%) | Hysteresis (%)<br>Cycle 1 | Cycle 2      | Cycle 3      | Cycle 4      | Cycle 5      |
|-------------|----------------------------------|----------------|---------------------------|--------------|--------------|--------------|--------------|
| TMAEA       | $0.092 \pm 0.0053$               | $1250 \pm 100$ | $14 \pm 2.1$              | $10 \pm 3.5$ | $9 \pm 1.5$  | $9 \pm 2.2$  | $9 \pm 2.9$  |
| TMAEA/VP2.5 | $0.11 \pm 0.0073$                | $1170 \pm 88$  | $20 \pm 4$                | $16 \pm 3$   | $15 \pm 1$   | $13 \pm 4$   | $13 \pm 4$   |
| TMAEA/VP5   | $0.13 \pm 0.0053$                | $1030 \pm 69$  | $35 \pm 6$                | $28 \pm 7$   | $28 \pm 5$   | $25 \pm 7$   | $24 \pm 5$   |
| TMAEA/VP10  | $0.21 \pm 0.0081$                | $900 \pm 17$   | $41 \pm 3.4$              | $35 \pm 8.7$ | $33 \pm 10$  | $33 \pm 3.4$ | $31 \pm 6.7$ |
| TMAEA/VP20  | $0.29 \pm 0.15$                  | $640 \pm 49$   | $68 \pm 12$               | $54 \pm 13$  | $50 \pm 9.8$ | $48 \pm 10$  | $48 \pm 5.3$ |
| TMAEA/VP30  | $2.6 \pm 0.47$                   | $160 \pm 35$   | $87 \pm 15$               | $65 \pm 17$  | $61 \pm 12$  | $55 \pm 12$  | $52 \pm 13$  |

**Table S3.** Tensile and hysteresis results of photopolymerized films TMAEA/NVP copolymers.

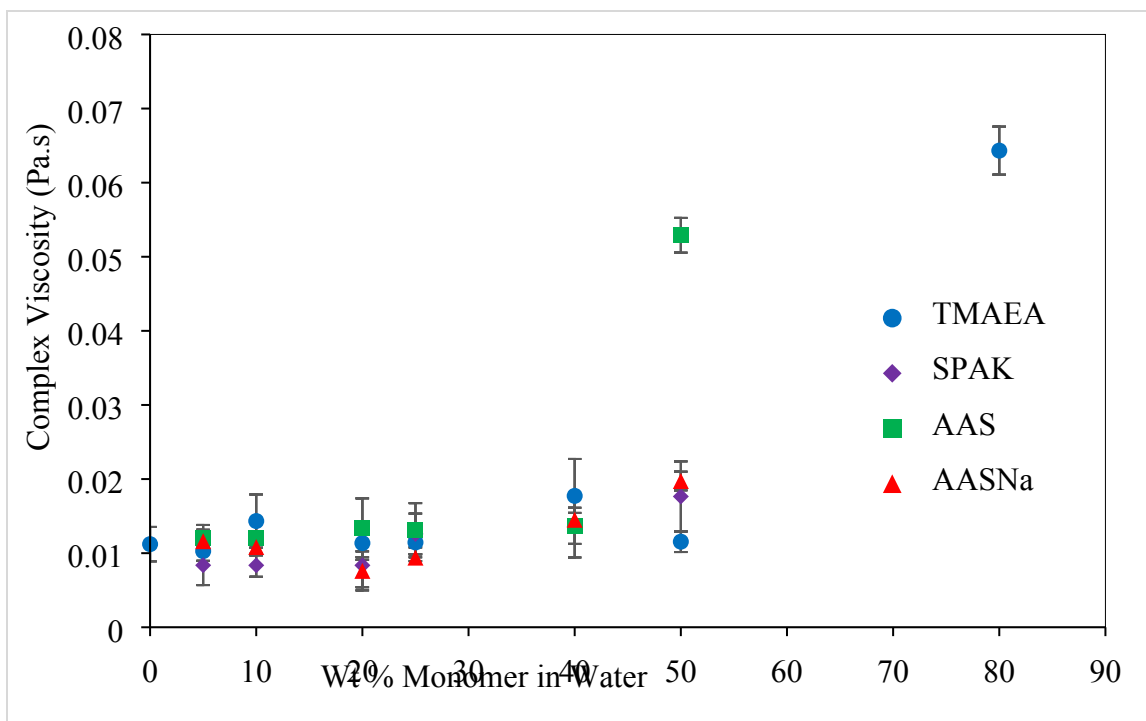

**Figure S2.** Concentric cylinder rheology provides complex viscosity of monomer solutions as a function of monomer concentration ( $n = 3$ ,  $p < 0.05$ ). TMAEA and AAS exhibit increased viscosity at photopolymerization concentration compared to AASNa and SPAK.

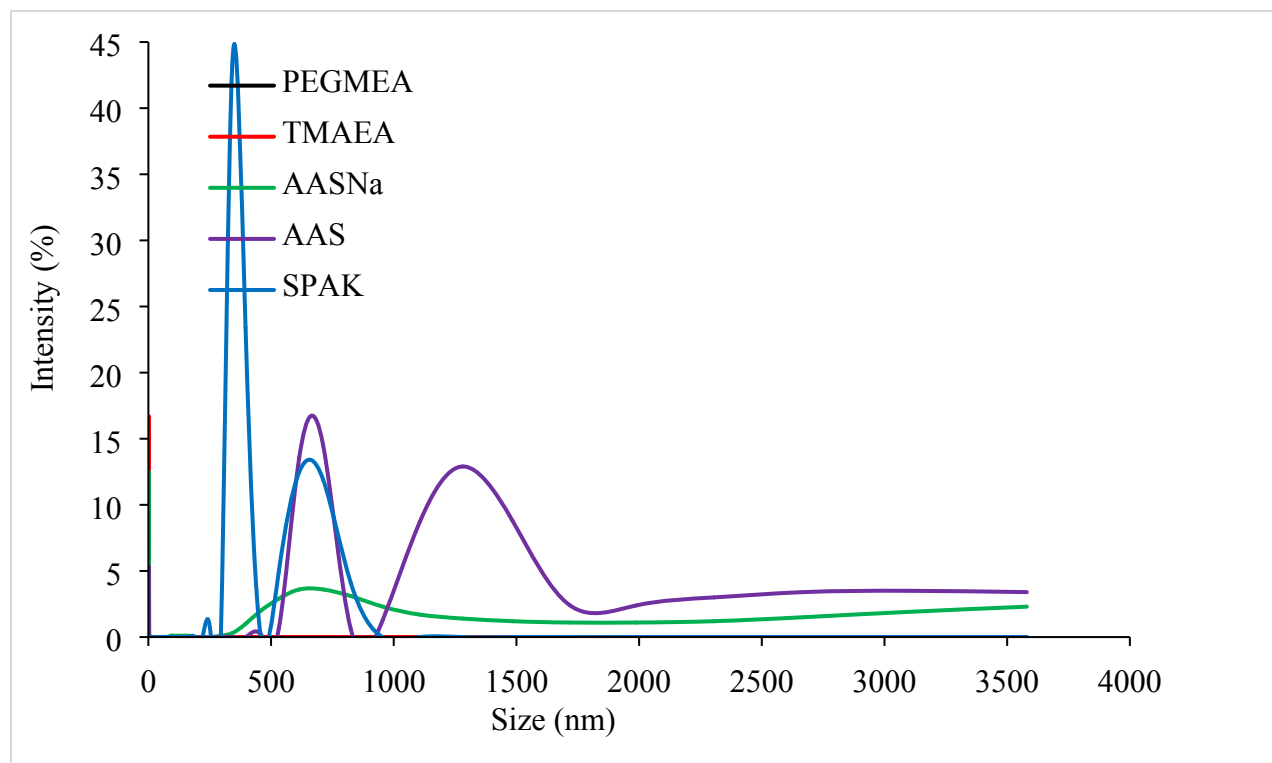

**Figure S3.** Dynamic light scattering reveals ionic aggregation in monomer.

Rheology of monomer solutions revealed complex viscosity as a function of monomer concentration (**Figure S2**). The increased viscosity of TMAEA and AAS at monomer concentrations relevant to photopolymerization (80 wt% and 50 wt%, respectively) suggests a role of monomer viscosity on final film modulus. This viscosity decreased significantly upon the addition of water to monomer solutions, confirming aggregate presence in monomer solutions. Interestingly, AASNa and SPAK, which both contain large counterions, failed to exhibit this increase in viscosity at 50 wt% in water. This decreased viscosity corresponded to a decrease in final film modulus, suggesting the potential for solution viscosity to aid in monomer selection for vat photopolymerization.

The discrepancies between monomers based on photo-DSC potentially arises from varied ionic aggregation in the monomer solution prior to polymerization (**Figure S3**). As seen in

dynamic light scattering, each of the ionic monomers exhibited larger aggregates as compared to PEGMEA<sub>480</sub>, suggesting a role in monomer aggregation for the successful formation of free-standing films. The size of each of these aggregates and their shape potentially direct both the kinetics of polymerization and the properties of the free-standing film.<sup>34-35</sup> Further studies as to the particular mechanism and the potential extension of these monomers is currently underway.

34. Noor, S. A. M.; Sun, J.; MacFarlane, D. R.; Armand, M.; Gunzelmann, D.; Forsyth, M., Decoupled ion conduction in poly (2-acrylamido-2-methyl-1-propane-sulfonic acid) homopolymers. *Journal of materials chemistry a* **2014**, 2 (42), 17934-17943.

35. Abdullah, M. M.; AlQuraishi, A. A.; Allohedan, H. A.; AlMansour, A. O.; Atta, A. M., Synthesis of novel water soluble poly (ionic liquids) based on quaternary ammonium acrylamidomethyl propane sulfonate for enhanced oil recovery. *Journal of Molecular Liquids* **2017**, 233, 508-516.
